# Supplementary material for: High-efficient Synthesis of Graphene Oxide Based on Improved Hummers Method
Source: Springer Nature journal article supplement (doi:10.1038/srep36143), 2016-11-03
Supplement: 41598_2016_BFsrep36143_MOESM1_ESM.pdf [file 41598_2016_BFsrep36143_MOESM1_ESM.pdf]

# Supplementary

## High-efficient Synthesis of Graphene Oxide Based on Improved Hummers Method

Huitao Yu, Bangwen Zhang\*, Chaoke Bulin, Ruihong Li, Ruiguang Xing

College of Materials and Metallurgy, Inner Mongolia University of Science and Technology, Baotou  
014010, China

\*Corresponding author

Bangwen Zhang Prof.: bangwenz@126.com

Table S1 Comparison of synthesis condition and product properties of GO through various methods

| Method                               | graphite | oxidant                                                                                                       | solvents               | Gr:Od:Sv<br>(w/w/v) | reaction<br>time | C/O atomic<br>ratio of GO | yield<br>of GO      |
|--------------------------------------|----------|---------------------------------------------------------------------------------------------------------------|------------------------|---------------------|------------------|---------------------------|---------------------|
| Brodie<br>method <sup>11</sup>       | -        | -                                                                                                             | fNA:cSA=1:4            | -                   | 3-4d             | 2.16                      | low                 |
| Staudenmaier<br>method <sup>12</sup> | 1g       | 30g                                                                                                           | 40mL fNA<br>+ 20mL cSA | 1:3:60              | 1-10d            | 2.89                      | low                 |
| Hummers<br>method <sup>13</sup>      | 100g     | 300g KMnO <sub>4</sub><br>+50g NaNO <sub>3</sub>                                                              | 2300mL cSA             | 1:3.5:23            | 2h               | 2.1-2.9                   | 40% <sup>[23]</sup> |
| Chen<br>method <sup>14</sup>         | 3g       | 9g KMnO <sub>4</sub>                                                                                          | 70mL cSA               | 1:3:23              | 2h               | 2.36                      | -                   |
| Kovtyukhova<br>method <sup>16</sup>  | 10g      | 40gKMnO <sub>4</sub><br>,10gK <sub>2</sub> S <sub>2</sub> O <sub>8</sub><br>,10gP <sub>2</sub> O <sub>5</sub> | 500mL cSA              | 1:6:50              | >8h              | 1.98                      | 92%                 |
| Marcano<br>method <sup>18</sup>      | 3g       | 18g KMnO <sub>4</sub>                                                                                         | 360mLcSA<br>+40mLcPA   | 1:6:133             | >12h             | -                         | 77%                 |
| Gao method<br><sup>21-22</sup>       | 10g      | 60g KMnO <sub>4</sub>                                                                                         | 400mL cSA              | 1:6:40              | 1~6h             | 2.2                       | -                   |
| Present<br>method                    | 10g      | 9g KMnO <sub>4</sub><br>6g KFeO <sub>4</sub>                                                                  | 100mL cSA              | 1:1.5:10            | 5h               | 2.12                      | 84%                 |

Note: cSA(concentrated sulfuric acid), cPA(concentrated phosphoric acid), fNA(fuming nitric acid), Gr(graphite), Od(Oxidant), Sv(solvents or acid).

Table S2 Comparison of electrochemical properties between GA1 and GA2

| Samples | Specific capacitance<br>( $F \cdot g^{-1}$ ) | GCD                  |                       | EIS<br>(Internal<br>Resistance) | Cycle Stability Curves<br>( Loss degree) |
|---------|----------------------------------------------|----------------------|-----------------------|---------------------------------|------------------------------------------|
|         |                                              | Charging time<br>(s) | Discharge time<br>(s) |                                 |                                          |
| GA1     | 273                                          | 690                  | 219                   | 0.6                             | 5.1%                                     |
| GA2     | 307                                          | 910                  | 280                   | 0.1                             | 4.8%                                     |

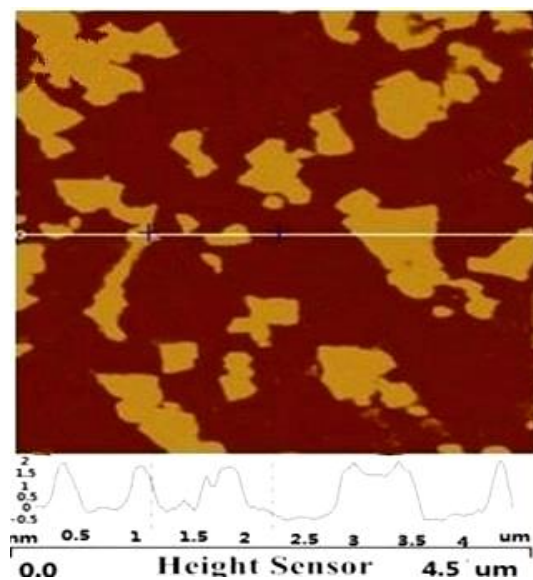

Fig.S1 AFM image of GO2

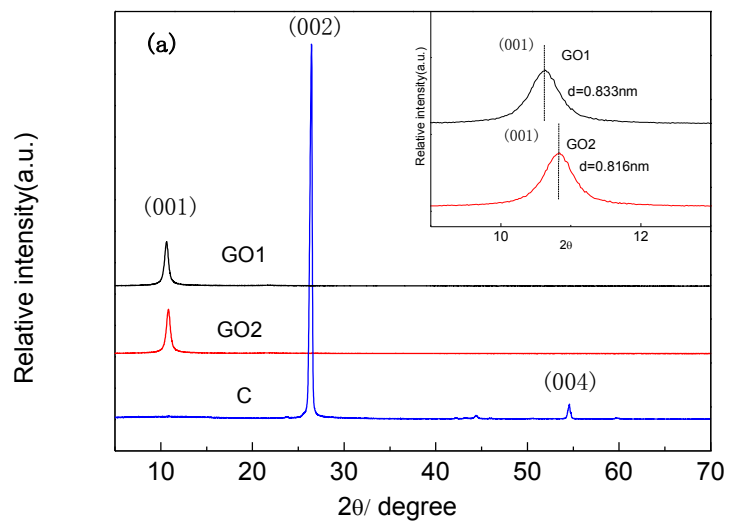

Fig.S2 XRD patterns of Graphite, GO1 and GO2
